# Supplementary material for: Ultrafast multi-focus 3-D nano-fabrication based on two-photon polymerization
Source: PubMed Central journal article supplement (PMC6522551; doi:10.1038/s41467-019-10249-2), 2019-05-16
Supplement: 41467_2019_10249_MOESM1_ESM.pdf [file 41467_2019_10249_MOESM1_ESM.pdf]

## Description of Additional Supplementary Files

**File name:** Supplementary Movie 1

**Description:** Demonstration of precise intensity and grayscale control. A checkerboard pattern ( $40 \times 40 \mu\text{m}^2$ ) is fabricated with a pitch of  $2 \mu\text{m}$ , where the graded structures are directly fabricated without compromising the speed ( $\sim 5 \text{ mm/s}$ ;  $22.7 \text{ kHz}$ ) and precision. The laser power at the high and low positions alternates between  $16 \text{ mW}$  and  $8 \text{ mW}$  repeatedly; the total write time is  $\sim 1.1 \text{ s}$ .

**File name:** Supplementary Movie 2

**Description:** Demonstration of multi-focus fabrication processes and results. One, two, three and four laser foci have been generated to parallelly write woodpile structures, respectively.
